# Supplementary figures and images for: A family of novel Mn3Ln4 clusters displaying single-molecule magnet behavior
Source: Royal Society of Chemistry journal article supplement (doi:10.1039/c4dt01816h), 2014-01-01

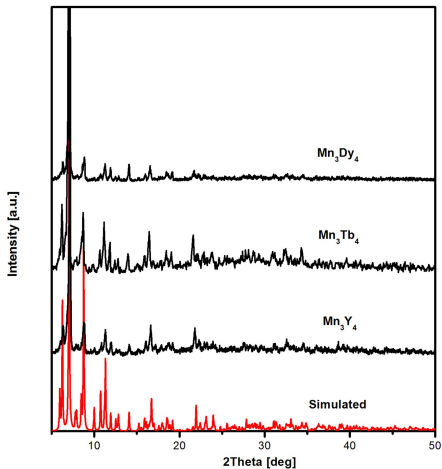

Supplement: c4dt01816h1.pdf [file c4dt01816h1.pdf]

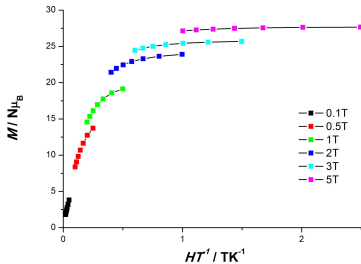

Supplement: c4dt01816h3.pdf [file c4dt01816h3.pdf]
